1 **Visual Response Properties in the Three Layer Turtle**

2 **Visual Cortex**

3

4 Mahmood S. Hoseini\*<sup>1</sup>, Jeff Pobst<sup>1</sup>, Nathaniel C. Wright <sup>1</sup>, Wesley Clawson <sup>2</sup>, Woodrow

5 Shew<sup>3</sup>, Ralf Wessel <sup>1</sup>

6

7 <sup>1</sup> Department of Physics, Washington University, St. Louis, MO

8 <sup>2</sup> Department of Electrical Engineering and <sup>3</sup>Department of Physics, University of

9 Arkansas, Fayetteville, AR

10

11 Contact information: Corresponding author email - [sayedmahmood@wustl.edu](mailto:sayedmahmood@wustl.edu)

12 **ABSTRACT**

13 Turtle dorsal cortex provides us with unique insights into cortical processing. It is  
14 known to share many features with the mammalian hippocampus and olfactory cortex  
15 as well as geniculo-cortical areas in stem amniotes from which mammals evolved. To  
16 this end, we have used data from extracellular recordings from microelectrode arrays to  
17 study spatial and temporal patterns of responses to visual stimuli as seen in both local  
18 field potential and action potentials. We discovered surprisingly large receptive fields,  
19 responsiveness to a broad range of stimuli, and high correlation between distant neural  
20 ensembles across recording array. Moreover, we found significant response variability  
21 regarding latency and strength in the presence of adaptation to both ongoing and  
22 visually evoked activity.

23

24 **Key Words:** (4-5) Visual Cortex, Receptive Field, Receptive Field, Response  
25 Spatiotemporal Properties

## 26 **Introduction**

27 Understanding evolutionary origins of the mammalian cortico-thalamic system will  
28 infiltrate our knowledge. The study was launched through reptilian brains since they are  
29 simpler than their mammalian counterparts (Butler and Hodos, 2005; Naumann et al.,  
30 2015). Comparing cortical circuits between mammals and reptiles opens up a window  
31 into the role of different brain areas in cognitive processing (Naumann et al., 2015).  
32 Turtles are of particular interest for comparative studies because they probably bear the  
33 strongest resemblance to the Triassic cotylosaurs (stem amniotes) from which they and  
34 all modern mammals evolved (Romer and Parsons, 1977). Concomitant with  
35 comparative studies characterizing spatiotemporal features of visual responses helps us  
36 to uncover the underlying circuitry in mammalian cortex and, ultimately, understanding  
37 how the cortex processes sensory information.

38 The turtle dorsal cortex is a convergent zone for the visual, auditory, somatic, and  
39 other sensory systems (Gusel'nikov et al., 1972). Nonetheless, it has mostly been  
40 studied with respect to visual processing. There are several studies on the spiking  
41 response to diffuse flashes (Gusel'nikov et al., 1972; Kriegstein, 1987; Mancilla et al.,  
42 1998) and moving black dots (Gusel'nikov and Pivovarov, 1977) as well as the size and  
43 organization of the receptive field (RF) of spiking cells (Mazurskaya, 1973a). However,  
44 there have only been very few studies focusing on voltage sensitive dyes (Prechtl et al.,  
45 1997) or local field potential (LFP; Bass et al., 1983; Prechtl, 1994; Prechtl and Bullock,  
46 1994; Prechtl et al., 2000; Luo et al., 2010). Nevertheless, there exist very little  
47 agreement about different features of response such as RF size, adaptation, and

48 direction tuning (Gusel'nikov et al., 1972; Mazurskaya, 1973a; Boiko, 1980; Mulligan  
49 and Ulinski, 1990; Luo et al., 2010).

50 Here, we have revisited some of these questions. The clues at our disposal to  
51 explore response spatiotemporal properties are extracellular recordings from  
52 microelectrode arrays (MEA) that capture key integrative synaptic processes in neural  
53 networks. We have found large RFs that typically cover over half of the visual field with  
54 no indication of direction selectivity in line with previous study (Boiko, 1980).  
55 Investigating spatial structure of the receptive fields, we have discovered no clear or  
56 well-defined retinotopic map from the visual field (VF) to the cortex. Furthermore, our  
57 results demonstrate a broad range of response latencies and a strong adaptation to  
58 both ongoing and visually evoked activity.

59

## 60 **Materials and Methods**

### 61 ***Ex Vivo Eye-Attached Whole Brain Preparation***

62 All procedures were approved by Washington University's Animal Care and Use  
63 Committees and conform to the guidelines of the National Institutes of Health on the  
64 Care and Use of Laboratory Animals. Adult red-eared turtles (*Trachemys scripta*  
65 *elegans*, 150 – 200 *g* weight, 12 – 15 *cm* carapace length) were studied. Rapid  
66 decapitation was performed following anesthetization with Propofol (10 *mg/kg*) (Ziolo  
67 and Bertelsen, 2009). We then removed the brain with the right eye attached and  
68 proceeded to hemisect the eye.

69 To access the ventricular surface of the left visual cortex, we cut off  $\sim 1$  mm of the  
70 left olfactory bulb, which provided a hole to start a rostral-caudal cut through the medial  
71 cortex. This cut continued from the olfactory bulb into the natural separation of the  
72 medial cortex from the septum (about  $1/3$  of the cortex) and continued further along the  
73 same line for  $\sim 1 - 2$  mm into the caudal cortex. Finally, two cuts were made from the  
74 medial cortex edge towards the dorsal cortex. These two cuts were started at roughly  
75  $1/3$  and  $2/3$  the rostral-caudal length of the cortex and were made as short as possible  
76 while still allowing the cortex to be unfolded and pinned flat. This length was usually  
77  $\sim 2$  mm.

78 After making the cuts in the cortex, it was placed in the recording chamber on either  
79 a Sylgard or agar surface, and insect pins were used to pin the cortex flat. Our  
80 electrodes were then placed in the flattened cortex. The eye and brain were  
81 continuously perfused with artificial cerebrospinal fluid (in mM; 85 NaCl, 2 KCl, 2 MgCl<sub>2</sub>,  
82 45 NaHCO<sub>3</sub>, 20 D glucose, and 3 CaCl<sub>2</sub> bubbled with 95% O<sub>2</sub> and 5% CO<sub>2</sub>), adjusted to  
83 pH 7.4 at room temperature. To perfuse the eye without obstructing the image we  
84 project onto the retina, a small wick was made from a Kimwipe. The wick connected an  
85 artificial cerebrospinal fluid (ACSF) feed located  $\sim 1$  cm above and to the side of the eye  
86 to the inside edge of the hemisected eye. If any brain tissue were large enough to  
87 extend above the surface of the ACSF (e.g., the right cortex or the optic tecta), it would  
88 be cover with a small piece of Kimwipe so that it would also stay in contact with ACSF.  
89 Recordings began 2-3 hours after anesthetization.

90

91 **Visual Stimulation**

92 For the included studies, three methods of visual stimulation were used.

93 *LED Stimulation.* For LED stimulation, a red LED was connected to the output of a  
94 National Instruments BNC-2090 terminal block connected to a National Instruments  
95 PCI-6024E DAQ board. This output was controlled with a custom LabView program on  
96 a computer running Windows 7. The mean light intensity at the retina was  $60 \text{ mW}/\text{m}^2$ .

97 *Monitor/Mirror Stimulation.* For monitor/mirror stimulation, a 19" LCD monitor  
98 (Samsung model Syncmaster T190, 1440x900 pixels, contrast ratio=20000:1, response  
99 time = 2 ms) displayed the stimuli. This image was reflected off a mirror located across  
100 room above the tissue, and focused on the retina with a lens placed above the tissue  
101 (Fig. 1a). The mean light intensity at the retina from the monitor was  $20 \text{ mW}/\text{m}^2$ .

102 *Projector Stimulation.* For projector stimulation, a small projector was placed above  
103 the retina and focused with a system of lenses (Aaxa Technologies, P4X Pico Projector,  
104 1440x900 pixels). The mean light intensity at the retina from the projector was  $1 \text{ mW}/$   
105  $\text{m}^2$ . Both monitor/mirror and projector stimulation was provided using software written in  
106 python on a computer running Ubuntu 10.4. Visual stimuli included black dots moving  
107 on a white screen, naturalistic video, and red LED flashes.

108

109 **Data Acquisition**

110 *Microelectrode Array Recordings.* Data were collected at a 30 kHz sampling rate  
111 using the Cerebus data acquisition system by Blackrock Microsystems. Two different  
112 styles of microelectrode arrays were used for our recordings. For some recordings, we  
113 used a 96-channel Utah array (Fig. 1b; 10x10 square grid, 400  $\mu\text{m}$  inter-electrode  
114 spacing, 500  $\mu\text{m}$  electrode length, no corner electrodes, Blackrock Microsystems). For  
115 others, we used an array of shank electrodes (4x4 array of shank electrodes with 8  
116 recording sites on each electrode, 300  $\mu\text{m}$  and 400  $\mu\text{m}$  x and y distance between  
117 shanks and 100  $\mu\text{m}$  between recording sites along a shank, Neuronexus). We attached  
118 either array to a post fastened to a micromanipulator (Sutter, MP-285). The Utah array  
119 was inserted to a depth of 250 – 500  $\mu\text{m}$  starting from the ventricular side of the  
120 unfolded cortex such that the plane of electrodes was parallel to the dorsal surface of  
121 the cortex. The array of shank electrodes was inserted deep enough to span the entire  
122 depth of the cortex.

123 We recorded wideband (0.7 Hz – 15 kHz) extracellular voltages relative to a silver  
124 chloride pellet electrode in the tissue bath.

125 *Single Electrode and Tetode Recordings.* For our experiments using single  
126 electrodes, we used tungsten electrodes (500  $k\Omega$  part #WE30030.5H5 from  
127 MicroProbes and 1000  $k\Omega$  catalog #573520 from AM Systems). For some experiments,  
128 we also used homemade tetrodes with resistances between 250  $k\Omega$  and 350  $k\Omega$ . These  
129 were made by twisting four 12.7  $\mu\text{m}$  nickel chromium wires together, applying heat with  
130 a heat gun (Weller 6966C) and cutting the twisted wires at an angle to expose the ends

131 for recording (Saha et al., 2013). Recordings were taken in reference to a silver chloride  
132 ground wire sitting in the bath.

133 The signals from these electrodes were recorded with an AM Systems Model 1800  
134 amplifier connected to a National Instruments PCI-6024E 12-bit DAQ board through a  
135 National Instruments BNC-2090. The data were collected at 20 *kHz* using Labview.

136

### 137 ***Filtering for Local Field Potential***

138 To study LFP, it is useful to filter out other frequencies. For our LFP analysis, we  
139 used the PyWavelets package to perform wavelet filtering (Wiltschko et al., 2008). We  
140 used Daubechies wavelets with a minimum level of 9 and a maximum level of 11. For  
141 our 30 *kHz* data, this corresponds to a pass-band of  $\sim 7 - 59$  *Hz*.

142 *Defining an LFP Event.* There are many ways one can quantify the size of an LFP  
143 response. One method we use throughout this paper is to look for threshold crossings  
144 of the extracellular signal after filtering it to the frequencies we are interested in. As a  
145 threshold for LFP events we used 3 times standard deviation of the filtered signal (Fig.  
146 1c). Therefore, when we refer to LFP event count, we are simply referring to a number  
147 of threshold crossings.

148 *Determining Visually Responsive Electrodes.* When recording from the 96  
149 electrodes of the MEA, only a subset of electrodes would actually have a strong visual



150 response. In order to get clean results, it is necessary to do our analysis on only that  
151 subset of electrodes.

152 To consistently and systematically determine which electrodes to include, we  
153 created an algorithm to test for visual responsiveness. Roughly speaking, an electrode  
154 was considered visually responsive if the typical level of activity following visual  
155 stimulation was sufficiently greater than spontaneous ongoing level activity. Specifically,  
156 we established the spontaneous ongoing level of activity,  $a_{ong}$ , by taking the average  
157 activity from 4 s windows immediately preceding the presentation of the stimulus.  
158 Similarly, the amount of visually evoked activity,  $a_{evoked}$ , was the average of the 4 s  
159 windows immediately following the onset of the visual stimulus. We then calculate the  
160 decrease in activity (how much lower is the ongoing activity level than the evoked  
161 activity level) as  $D = 1 - \frac{a_{ong}}{a_{evoked}}$ . Finally, we classify an electrode as visually responsive  
162 if the decrease in activity is greater than 0.75 (Fig. 1b).

163

### 164 ***Defining Receptive Field Similarity***

165 To quantify RF similarity between nearby electrodes, we calculated the amount of  
166 overlap between the RFs from pairs of electrodes. Specifically, we binned the dots  
167 paths in visual field (bin size = 8 visual degrees), calculated the normalized average  
168 LFP response to stimulation in each of those bins, and for each electrode pair, we  
169 calculated the RF overlap (also called similarity) by summing the smaller of the two  
170 normalized response values (one for each electrode) over all bins.

171 The normalization of the average LFP response in each bin was done by dividing  
172 the average response by the sum of the average responses over all bins (or, in the case  
173 of direction specific RF similarity, by dividing by the sum of the average responses over  
174 only the bins for the angle of interest). Consequently, the sum of the normalized  
175 responses over all bins was always one, the minimum similarity between two electrodes  
176 was zero, and the maximum was one.

177

## 178 **RESULTS**

### 179 ***Overview***

180 To quantify the spatiotemporal structure of visual responses we recorded  
181 extracellular neural activity using MEAs inserted into the geniculo-recipient dorsal cortex  
182 of the turtle eye-attached whole-brain *ex vivo* preparation during visual stimulation of the  
183 retina (Fig. 1a). First, we explore spatial properties in terms of RF size, RF similarity,  
184 and direction sensitivity; and then temporal features are quantified in terms of response  
185 duration, latency, and adaptation.

186

### 187 ***Spatial Properties***

188 LFP traces were recorded in response to black dots moving across a white  
189 background (8 degrees diameter dot moving at 40 *deg/s*). Dots move in several  
190 different directions (either 4 or 8 different angles), and for each angle, dots move along

191 8 different straight paths spanning the visual field. Our probe of the spatial structure  
192 includes RF size, RF similarity, and direction selectivity and is as follows.

### 193 1. *RF size*

194 LFP in response to moving dots on the screen is used to determine the size of RF.  
195 For each moving dot along a path, we mark LFP events of a given electrode (Fig. 1c;  
196 see Materials and Methods). In order to aid visualization, LFP events are plotted  
197 somewhat offset from the actual path of the presented dots. Events are color coded  
198 according to the direction of the moving dots. Responses in each direction over different  
199 trials and paths are summarized in the distribution of the average LFP event count with  
200 the trial-to-trial variability shown as the filled region around the average line (Fig. 2).

201 Typically, near the edges (for the first and last paths) LFP response diminishes.  
202 This is due to the fact that for those paths dots spend less time moving in the visual field  
203 (Fig. 2). More importantly, the RF of the LFP seems to span large areas of the visual  
204 field in different preparations (Fig. 3) as well as across different electrodes of MEA (Fig.  
205 4). We see that RFs commonly cover over half of the visual field.

### 206 2. *RF response similarity across the cortex*

207 Looking at the RFs plotted across MEA, it appears that the RFs of nearby  
208 electrodes are more similar to each other than those of distant electrodes (Fig. 4 and  
209 Fig. 5a). To quantify the similarity of RFs between pairs of electrodes, we calculated the  
210 amount of overlap by binning the dots paths in the visual field to calculate the  
211 normalized average LFPs. Then we sum the smaller of the two normalized response

212 values over all bins and divide it by the sum of the average responses over all bins (see  
213 Materials and Methods). To determine the significance of similarity between two  
214 electrodes, we recalculated the similarity between the two electrodes after shuffling the  
215 binned responses of one of the electrodes. This process was done 1,000 times. We  
216 then call the original similarity significant if it is higher than 95% of the shuffled  
217 similarities.

218 Our analysis demonstrates that neighboring electrodes have significantly similar  
219 RFs, consistent with our qualitative conclusion (Fig. 5b). Regardless of the direction of  
220 moving dots, RFs of the given pair exhibit a significant similarity of 0.46. Now the  
221 question remains to be answered is that does RF similarity depend on the spatial  
222 separation between electrodes? For the four turtles that had several visually responsive  
223 electrodes, we plotted the similarity versus distance for a single electrode paired with all  
224 other electrodes. Then we made this plot for all visually responsive electrodes, and  
225 finally, we arranged these plots in the same way the corresponding electrodes are  
226 arranged on the MEA (Fig. 6a). Mostly negative slopes indicate that RFs of nearby  
227 electrode pairs tend to be more similar to each other than the RFs of distant electrode  
228 pairs. The average RF similarity at each electrode pair distance for all visually  
229 responsive electrode pairs for four turtles indicates a consistent decay (Fig. 6b).

230 Additionally, it appears that the negative slope can be found more consistently for  
231 the rostral electrodes than for the caudal electrodes (Fig. 6a). The caudal electrodes  
232 tend to have slopes closer to zero. This means that the RFs at caudal electrode sites  
233 are no more (or only slightly more) similar to their neighbors than they are to distant

234 electrodes. This is seen more clearly when looking at a larger section of the array and is  
235 a consistent result across turtles (data not shown). It is worth noting that in a majority of  
236 cases; even the lower levels of similarity are still significantly more similar than shuffled  
237 data.

### 238 *3. Direction Sensitivity*

239 Moving dots in different directions provide us with the opportunity to look for the  
240 preference of one direction over the opposite direction (opposite directions that cover  
241 the same spatial region in the visual field). By looking at the average LFP event counts  
242 along the same path for opposite directions, we can get a sense of whether a recording  
243 site shows sensitivity to one direction compared to the opposite direction. We found no  
244 examples of an LFP being visually responsive to dots moving in one direction but not  
245 the opposite direction (Figs. 2, 3, and 5). Averages of LFP count along the paths ((solid  
246 line distributions in Figs. 2, 3, and 5) further support this hypothesis. Overwhelmingly,  
247 we discovered that the average response curves to opposite directions are nearly mirror  
248 images of each other (see Fig. 2 for example). This indicates that there is no opposite  
249 angle direction sensitivity in the LFP response (when quantifying the LFP response as  
250 the number of threshold crossing of the LFP).

251

### 252 *Temporal Properties*

253 So far we have looked at the spatial structure of the responses. One equally  
254 important topic to explore is the time course of the responses. How long do responses

255 to brief and extended stimuli last? How long is the response latency in the visual cortex?  
256 How does the strength of responses adapt? Does adaptation depend on stimulus  
257 characteristics?

258 LFP signals in response to brief LED flashes (50 *ms*) often contain oscillations that  
259 last for several hundreds of millisecond regardless of the flash amplitude (Fig. 7a).  
260 While at earlier times after flash onset these oscillations are clearly dominated by one or  
261 two frequencies, at later times, they are made up of fluctuations covering a broad range  
262 of frequencies (Fig. 7a). Rather than characterizing power spectrum of the responses,  
263 we quantify the temporal properties of LFP events after flash onset in terms of response  
264 duration, latency, and adaptation.

### 265 1. *Response duration*

266 For each trial and flash amplitude, we determine threshold crossings after stimulus  
267 onset, and then sum over trials to obtain prestimulus time histogram (PSTH; Fig. 7b, c,  
268 and d). We typically see responses that last 500 ms to 1 s depending on the flash  
269 amplitude. In addition, when looking at visually evoked LFP activity over an extended  
270 period of time, in many instances, we also see a second (or even third) period of activity  
271 after periods of relative inactivity even several seconds after flashes (Fig. 8). This  
272 persistent activity occurs on different electrodes of all preparations (Fig. 8) even in  
273 response to very brief flashes (10 *ms*). If we compute PSTHs for several electrodes and  
274 arrange them based on their location in MEA, we see a reliably reproducible wave of  
275 activity up to 10 s after the presentation of a flash (Fig.8).

### 276 2. *Response latency*

277 Our results involve relating the activity recorded in the cortex with the stimulus  
278 presented to the retina. One important aspect of this relationship is how much delay  
279 there is between the presentation of the stimulus and the response caused by signal  
280 propagation time in the pathway leading to the cortical response. This is an interesting  
281 question per se, but also an essential piece of information when it comes to interpreting  
282 the responses to stimuli that cannot be characterized as occurring at only one instance  
283 in time.

284 We investigated the latency between stimulus presentation and the first evoked  
285 spike recorded on extracellular electrodes. To this end, we looked at the latency to the  
286 first spike in response to stimuli with a precise ON time covering the entire visual field.  
287 When looking at responses to a full-screen flash or to the change from a blank screen to  
288 the start of a complex movie, we found an extensively wide range of latencies (Fig. 9).  
289 Our results indicate that a typical latency to first evoked spike is around 200 – 500 *ms*  
290 (Fig. 9). A further support for this delay appears through RF analysis. For each LFP  
291 event detected, if we mark the region of the visual field in which the dot was at earlier  
292 times (0, 150, 300 *ms*), we see the most overlap of the contributions to the visual field  
293 from the dots moving at different angles (Fig. 10). As such, for all figures showing the  
294 RF as probed by moving dots, a 300 *ms* delay has been applied.

### 295 3. *Adaptation*

296 The effects of adaptation in turtle visual cortex are clear, long lasting, and  
297 ubiquitous. An adapted response in the visual cortex can be the result of two different  
298 sources: The cortex may be adapting in such a way that it has a diminished response

299 (relative to the unadapted state) to the same cortical input, or adaptation has taken  
300 place at an earlier stage in the visual pathway, and the cortex is still responding in a  
301 consistent way as before adaptation but to a diminished cortical input. To determine  
302 whether cortex has an adaptation mechanism, we looked at responses in the presence  
303 or absence of prior stimulus.

304 *Visual-Visual Adaptation:* To test the effect of a stimulus on a subsequently presented  
305 stimulus, we used moving dots, radially moving bars, and full field flashes. In the  
306 clearest demonstration of adaptation, when we presented a series of 100 *ms* duration  
307 LED flashes to the retina, we reliably recorded a strong LFP response to the first flash,  
308 and either no response or a greatly diminished response to the subsequent flashes  
309 presented 2 *s* afterward (Fig. 11a). The extent to which the subsequent responses were  
310 diminished depended on the time separation of the flashes. Consistent with an earlier  
311 study (Luo et al., 2010), this dependence was not all-or-none; in between the short  
312 inter-flash-intervals that completely abolished subsequent responses and the long inter-  
313 flash-intervals that seemed not to affect subsequent responses, there were intermediate  
314 inter-flash-intervals that resulted in somewhat diminished subsequent responses.

315 We further demonstrated the effects of adaptation with more complex stimuli  
316 containing spatial and temporal structure. To quantify response adaptation to  
317 subsequent stimuli, we used dots moving along different paths through the visual field.  
318 For 8 different angles, we moved dots across 5 paths in the visual field in an ordered  
319 sequence. For opposite angles, the paths overlapped but were in reversed order, e.g.  
320 the path that was presented first at an angle of 0 degrees was presented last at 180  
321 degrees. This allowed us to compare the response to presentation order while



322 controlling for the area of the visual field being stimulated.

323 To quantify the effects of adaptation due to stimulus presentation order, we defined  
324 the decrease in response,  $d$ , as simply the average of the decreases for individual paths  
325 according to  $1 - \frac{r_{late}}{r_{early}}$ , where  $r_{late}$  is the strength of the response when the path was  
326 presented late in the series (either the fifth or fourth path to be presented), and  $r_{early}$  is  
327 the strength of the response when the path was presented early in the series (either first  
328 or second).

329 When we look at the response amplitude when a path was presented first compared  
330 to the same path being presented fifth (or second compared to fourth), we clearly see  
331 adaptation of responses to stimulation of one area of the visual field caused by previous  
332 stimulation of other areas of the visual field (Fig. 11b).

333 On average, the evoked response to the fifth path is 76% smaller than when it is the  
334 first presented path. Similarly, fourth path response is 82% smaller than the second  
335 path response. The fact that the decrease in response strength is larger and more  
336 reliable for the second-fourth pairs than it is for the first-fifth pairs is most likely due to  
337 complications near the edge of the visual field. The first/fifth paths are always on the  
338 very edge of the visual field. Consequently, the dots moving along those paths were not  
339 projected to the retina nearly so long as dots moving across paths crossing a larger  
340 portion of the retina. In general, these outer paths evoked smaller responses than more

341 interior paths. As such, these weaker responses may be more confounded by noise.

342 In a different set of experiments, adaptation to visual stimuli was studied while  
343 controlling for not only same path in the visual field, but also the direction of motion  
344 along that path. In contrast to the previous data set, in this data set the order in which  
345 the paths were traversed was randomized for each trial. Thus, a given path may have  
346 been the first path presented during one trial, but the fourth path presented during the  
347 next. This allowed us to separate the responses to a dot moving along any given path  
348 into trials for which the path was the first path to be presented and trials for which the  
349 path was not the first path presented. Using the same LFP threshold crossing described  
350 earlier, for each path, we calculated two average responses: the average first-presented  
351 response and the average non first-presented response. For this data set, time interval  
352 between dots moving in a given direction is 10 s. After presenting all 5 paths, there is  
353 either 118 s or 214 s waiting time before starting a new set of 5 dots in a different  
354 direction. In Fig. 11c the average response when a path was first is plotted against the  
355 average response to that same path when the path was not first. Because there were  
356 very few trials for any given angle-path combination, the results are somewhat  
357 scattered. But, when taken as a whole, for the 575 responsive points shown, average  
358 non first-path responses are significantly weaker than the average first-path responses (  
359  $p = 1.7E - 20$ ).

360 *Ongoing-Visual Adaptation:* While the results so far clearly demonstrate an adapted  
361 response to visual stimuli, they do not shed any light on the sources of adaptation. It is  
362 unclear if the adaptation is taking place in the cortex, at an earlier stage in the visual

363 pathway, or (most likely) some combination of both effects. To better understand  
364 adaptation happening within the cortex, we looked at how visual responses adapted to  
365 spontaneous activity within the cortex (Fig. 11d). Here we looked at repeated trials of a  
366 given stimulus and picked out the trials that had a large burst of LFP events within the  
367 5 s leading up to the stimulus presentation. We then calculated the average response to  
368 4 trials of the same stimuli that did not have a large spontaneous burst preceding them.  
369 To avoid having our results confounded by experimental rundown, we selected the 4  
370 trials that occurred most closely in time to the trial that was preceded by spontaneous  
371 activity. It is clear that spontaneous activity in the cortex can lead to a significant and  
372 reliable adaptation of subsequent visual responses (Fig. 11d). Although our results do  
373 not disentangle adaptation in the cortex from adaptation in pathways leading to the  
374 cortex, it indicates that the cortex has an adaptation mechanism by itself such that  
375 ongoing burst of activity diminishes subsequent response strength.

376

### 377 ***Response Variability***

378 Despite response characterization so far, we see large a variability in the responses  
379 to repeated presentations of the same stimulus. This variability manifests itself in  
380 different ways from variable strength to variable timing or even variable temporal and  
381 spectral properties (OUR PAPER).

382 Looking at the responses to moving dots, there seem to be two different visual  
383 responses to dots moving along the 3<sup>rd</sup> and 4<sup>th</sup> paths (Fig. 12). If we focus on the  
384 responses to the 3<sup>rd</sup> path, we see that of the 16 trials, there are only responses in 5 or 6

385 of them (first of those “responses” is likely a spontaneous activity, since it starts slightly  
386 before the stimulus). On the other trials, there are no visible LFP oscillations. Two of the  
387 non-responding trials might have been affected by adaptation from the bursts of activity  
388 preceding the stimulus but that still leaves 8 non-responsive trials. Similarly, the non-  
389 responsive trials for the 4<sup>th</sup> path are likely due to the responses to the 3<sup>rd</sup> path that  
390 occurred just before the 4<sup>th</sup> path. Interestingly, this all-or-none response variability was  
391 not seen for dots moving in the opposite direction along the same paths in a set of  
392 recordings taken over the same period of time (data not shown).

393 We also see variability in the temporal structure of the response (Fig. 12). Not only  
394 do responses to both the 3<sup>rd</sup> and the 4<sup>th</sup> path have substantial differences in the time to  
395 response onset (sometimes varying by as much as a second), but they also vary in how  
396 that response plays out. For some trials (e.g., trials 1-3) we see roughly one large  
397 oscillation, and for others (e.g., trial 4) it looks more like a series of two smaller bursts.

398 Finally, Fig.12 also contains examples of response strength variability. If we  
399 compare the responses to the 3<sup>rd</sup> path in the 7<sup>th</sup> and 8<sup>th</sup> trial, we find markedly different  
400 amplitudes of response. These interesting observations worth exploring further in future  
401 studies.

402

### 403 ***Spike-LFP Correlation***

404 In general, spikes are much less common in the absence of LFP activity than they  
405 are during a burst of LFP activity and there is a clear positive correlation between the  
406 number of action potential and the number of LFP peaks (Shew et al., 2015). Here we

407 look at the RF size using detected spikes and then compute its similarity to the RF  
408 obtained using LFP events. Again, spike RFs cover a large region of the visual field  
409 and, in other words, units fire action potentials in response to dots presented at different  
410 locations of the visual field (Fig. 13a). However, spikes have a less reliable trial-to-trial  
411 variability since they are less common than LFP events. More importantly, spike RF is  
412 exceptionally (~80%) similar to the RF obtained using detected LFP events on the same  
413 electrode (Fig. 13b; average overall similarity  $45 \pm 15\%$ , *mean  $\pm$  std*).

#### 414 ***Possible Mapping of the Visual Field to the Visual Cortex***

415 For decades it has been reported that pyramids in turtle visual cortex respond to  
416 small moving stimuli spanning a very large portion of the visual field. While our results  
417 show large RFs for both LFP events and spiking activity, when we looked for more  
418 detail in the spatial structure of the RFs, there is less of a consensus regarding what to  
419 expect. Though there is not a clear and well-defined retinotopic map to the cortex, there  
420 have been a few studies that report on projection at two steps leading from the retina to  
421 the cortex. It has been hypothesized that naso-temporal axis of visual space is  
422 represented along the rostro-caudal axis of the visual field (Mulligan and Ulinski, 1990).  
423 However, this prediction contradicts earlier results indicating opposite polarity in  
424 recorded evoked potentials in response to localized visual stimulation of the retina  
425 (Mazurskaya, 1973a).

426 To resolve this puzzle, we used moving dot stimuli and investigated whether the  
427 nasal-temporal response specificity changes as we compare data from electrodes in the  
428 rostral cortex with those from caudal cortex. By performing the same experiments with  
429 the visual stimuli rotated 90 degrees, we were able to investigate dorso-ventral

430 response specificity. We found that neither Mazurskaya's results nor Mulligan and  
431 Ulinski's predictions are consistent with our findings.

432 *Naso-temporal Visual Field.* We tested this with moving dots that followed straight paths  
433 from the top of the visual field to the bottom (as well as dots moving in the opposite  
434 direction). Eight of these vertical paths were spread out at different naso-temporal  
435 locations spanning the visual field. Only one dot (following one path) would move at a  
436 time. After moving these dots along the different paths we could look for naso-temporal  
437 response specificity at any given recording site in the cortex to see if the nasal-temporal  
438 response specificity changes as we compare data from electrodes in the rostral cortex  
439 with those from the caudal cortex.

440 Our results show that, as you compare the naso-temporal response specificity of  
441 different recording sites, the strength of response specificity does change, but the  
442 pattern of specificity was approximately the same for all recording sites, and the  
443 variations from site to site did not follow any clear trend (e.g., rostral recording sites  
444 responding strongly to one area while caudal sites respond strongly to a different area;  
445 Fig. 14a).

446 *Dorso-Ventral Visual Field.* By performing the same experiments with the visual stimuli  
447 rotated 90 degrees, we investigated response specificity for different elevations in the  
448 visual field. In contrast with previous predictions, we found recording sites that  
449 responded clearly to only the upper or only the lower visual field rather than stimulation  
450 at all elevations (Fig. 14b). Overall these findings strongly support no well-defined  
451 mapping from the visual field to the visual cortex.

452

## 453 **DISCUSSION**

454 Here, we investigated the basic spatiotemporal properties using MEA recordings of  
455 visual responses in turtle whole-brain eye-attached *ex-vivo* preparations while  
456 stimulating retina primarily with black moving dots in different directions. We found large  
457 RFs that typically cover over half of the visual field with no indication of direction  
458 sensitivity. Our investigations revealed no clear or well-defined retinotopic map from the  
459 visual field to the cortex. Additionally, a broad range of response latencies and a strong  
460 adaptation to both ongoing and visually evoked activity have been observed.

461 We know that the size of RFs in lateral geniculate nucleus (LGN) cells is restricted  
462 to 30 degrees (Boiko, 1980) and that there are thalamic axons connecting to the cortex  
463 with RFs as small as 2-5 degrees (Mazurskaya, 1973a). Then how does large cortical  
464 RF settle with small RF found in the LGN? Two explanations are conceivable here. It  
465 could be that an individual cortical cell has a large RF because it receives input from  
466 many LGN cells whose RFs collectively span a large area of the visual field, but these  
467 seems unlikely given the proposed projections from LGN to cortex (Mulligan and Ulinski,  
468 1990). Therefore, what seems more likely is that the large cortical RFs may be the  
469 result of individual cortical cells receiving input from many other cortical cells that each  
470 receives LGN input representing only a small portion of the visual field.

471 While it is important to understand the thalamic inputs to the cortex, we firmly  
472 believe that intracortical connections play an essential role in determining the RF size  
473 and structure. The extent to which the RF of individual cells in the visual cortex depends

474 on the connectivity with other cortical cells has been demonstrated by comparing the  
475 normal RF of a cortical cell to its RF after applying pharmacological blockers to different  
476 areas of the cortex (Mazurskaya, 1973b). In support of our viewpoint, this study found  
477 that after applying blockers to other areas of the cortex, there would be gaps in the large  
478 RF that previously were not present. This suggests that for that cell, its responsiveness  
479 to certain regions of the visual field depended on receiving signals from the blocked  
480 region of the cortex.

481 How the RF similarity of nearby pairs can be interpreted? It might suggest that LFP  
482 reach is larger than the inter-electrode distance ( $\sim 400 \mu\text{m}$ ) so that neighboring  
483 electrodes are essentially measuring the same signal. While there have been some  
484 recent claims that the spatial extent of the LFP can be as large as several millimeters  
485 (Kajikawa and Schroeder, 2011), it has usually been thought that the LFP represents  
486 neural activity within roughly  $150 - 400 \mu\text{m}$  of the electrode (Katzner et al., 2009; Xing  
487 et al., 2009). The fact that we occasionally see bursts in narrow frequency bands on one  
488 electrode but not on the adjacent electrode (data not shown) is consistent with a smaller  
489 spatial extent for the LFP. This suggests that the similar RFs recorded at different  
490 electrodes (spaced  $400 \mu\text{m}$  apart) are not merely measurements of the same signal  
491 generated by common sources, but are instead measurements of activity generated by  
492 different sources. A reasonable speculation is that they happen to produce similar  
493 signals due to immense recurrent connections among neurons.

494 Our findings overwhelmingly point to no direction sensitivity in moving dot  
495 experiments and this is in agreement with previous studies. It has been reported that



496 only 9% of units in turtle thalamus show direction sensitivity, though the significance of  
497 these results is questionable (Boiko, 1980). Whether or not direction sensitivity exists in  
498 the thalamus affects how we think about its occurrence in the cortex. In either case, we  
499 have to take synaptic connection structure into account to explain direction insensitivity  
500 of cortical neurons to given thalamic inputs.

501 It takes time for the signal elicited by visual stimuli to travel from the retina to the  
502 thalamus and then to the cortex. Many studies have reported first spike latencies in  
503 visual cortex to be between 80 ms and 200 ms (Mazurskaya, 1973a) and even as short  
504 as 25 – 150 ms (Bass et al., 1983), and latency to LFP response onset of  $86 \pm 4$  ms  
505 (Prechtl and Bullock, 1994). However, we found that, in responses to a full screen flash  
506 or to the change from a blank screen to the start of a complex movie, a typical latency to  
507 first spike is around 200 – 500 *ms* which is longer than previously reported latencies. In  
508 addition, we provided further support for this range of time delays by looking at the  
509 structure of RFs and making it maximally convergent.

510 The effects of adaptation in turtle visual cortex have long been studied. Our  
511 investigation stated that the cortex has an adaptation mechanism but did not speak  
512 about adaptation in neural pathways leading to the cortex. It is almost certainly the case  
513 that both of these effects contribute to the adaptation observed in the cortex. Adaptation  
514 in our preparations seems to persist for several seconds to a minute in line with others  
515 that showed complete recovery happens in  $\sim 16$  s (Luo et al., 2010). Though some  
516 studies described recovery times in visual cortex ranging from 0.5 min to

517 3 min (Gusel'nikov et al., 1972). We suspect that the apparent discrepancy is due to the  
518 different stimuli they used.

519 Variability we observed in turtle visual cortex has also been seen in cat visual cortex  
520 in voltage sensitive dye recordings (Holt et al., 1996; Sadagopan and Ferster, 2012). It  
521 has been shown that much of the trial-to-trial variability could actually be explained by  
522 the ongoing activity in the cortex (Arieli et al., 1996). That is to say that after subtracting  
523 the activity of the cortex immediately preceding the response, the variability of the  
524 responses was greatly reduced. More generally, it has been suggested that sensory  
525 responses should be thought of as not simply the product of a sensory input and some  
526 "default" anatomical connectivity, but instead the product of those along with learned  
527 expectations and environmental contingencies that can change continuously (Fontanini  
528 and Katz, 2008).

529 A complication our results point to is the presence of a well-defined retinotopic map  
530 from the visual field to the cortex. Using retinal ablation and observing orthograde  
531 degeneration, Ulinski and Nautiyal (1988) reported that the nasal retina projects to the  
532 contralateral rostral lateral geniculate nucleus (LGN). Later, Mulligan and Ulinski (1990)  
533 found that the rostral LGN projects to the caudal cortex and the caudal LGN projects to  
534 the rostral cortex. Combining these two observations they predicted that the nasal-  
535 temporal axis of visual space is represented along the rostro-caudal axis of the visual  
536 cortex. This prediction contradicted earlier results from Mazurskaya(1973), who  
537 observed the opposite polarity in recorded evoked potentials in the visual cortex while  
538 presenting local visual stimulation to the retina.

539 Ulinski and Nautiyal suggest that the dorso-ventral axis of the retina projects along

540 the dorso-ventral axis of the LGN, but the data supporting this claim were much less  
541 clear than the data supporting conclusions about naso-temporal projections. Continuing  
542 along this visual pathway, Mulligan and Ulinski reported that (at least some) neurons in  
543 any given dorso-ventral transect of the LGN project along the full lateral-medial extent of  
544 the cortex. Thus, a neuron located anywhere along a lateral-medial line in the cortex  
545 can respond to stimulation at any point along a particular vertical line in the visual field.  
546 With moving dot stimuli, we found that response specificity has variable amplitude but  
547 similar patterns for different recording sites. Also, response variations from site to site  
548 did not follow any clear trend. We are convinced that experimental data supports our  
549 conclusions better than previous studies.

550 What do we learn by comparing visual cortex in turtles with mammals? Inferior  
551 temporal cortex (IT) is a visually responsive area in mammals that has a striking  
552 resemblance to what we found in turtle cortex. In IT responses to visual stimuli persist  
553 up to 15 s (Fuster and Jervey, 1981) and its cells also tend to have large RFs, respond  
554 to many stimuli, including moving stimuli, and have adaptation effects with inter-stimulus  
555 intervals less than 5 s (Gross et al., 1972). Unlike turtle visual cortex strong direction  
556 sensitivity has been observed in mammalian IT. Some of the direction sensitive IT cells  
557 had one clear preferred direction (termed unidirectional), but most were bidirectional  
558 sensitive (they responded preferentially to both a direction and the opposite direction,  
559 but not perpendicular motion). This was demonstrated in IT using black bars sweeping  
560 across the visual field while we have used black dots that take up only a small portion of  
561 the visual field. To scrutinize the similarity, further studies should be done with moving  
562 bars that span the entire visual field.

563 Mammalian hippocampus and piriform cortex are other areas that have a similar  
564 structure to turtle cortex. Like turtle visual cortex, the mammalian hippocampus has  
565 extensive feedback connections to its primary input source (entorhinal cortex; Witter,  
566 1993). In the hippocampus, like turtle cortex, oscillations are found in the gamma band  
567 (Bragin et al., 1995) and theta band with electrodes spanning several hundred microns  
568 having similar LFP signals (Buzsáki, 2002).

569 The olfactory or piriform cortex is a three layer cortical structure, and has  
570 feedforward and feedback circuits that are similar to those found in turtle dorsal cortex  
571 along with numerous other similarities (Haberly, 1985). Further identifying structural and  
572 functional similarities between the turtle dorsal cortex and mammalian piriform cortex  
573 will likely help elucidate common organizational and computational principal of cortical  
574 networks (Fournier et al., 2014).

575 Though we have not yet seen the multitude of studies on turtles as we've seen with  
576 other preparations such as rat, mouse, and cat; the turtle preparation is becoming more  
577 appreciated for allowing the experimenter to study cortical processing from the  
578 subcellular level to the level of neuronal ensembles simultaneously, as well as being  
579 tolerant enough to a wide range of flexible modifications to meet the needs of a range of  
580 experiments with different technical demands.

581

## 612 **ACKNOWLEDGEMENTS**

613 We thank members of the Neurophysics Laboratory for helpful discussions.

614

## 615 **CONFLICT OF INTEREST STATEMENT**

616 No conflict of interest exists for any of the authors.

617

## 618 **ROLE OF AUTHORS**

619 JP and RW devised the study; JP, NW, WC, WS, and RW performed the experiment;

620 MH and JP analyzed the data; MH, JP, and RW wrote and revised the manuscript.

621

## 622 **References**

- 623 Arieli A, Sterkin A, Grinvald A, Aertsen A (1996) Dynamics of Ongoing Activity: Explanation of  
624 the Large Variability in Evoked Cortical Responses. *Science* 273:1868–1871.
- 625 Bass AH, Andry ML, Glenn Northcutt R (1983) Visual activity in the telencephalon of the painted  
626 turtle, *Chrysemys picta*. *Brain Res* 263:201–210.
- 627 Boiko VP (1980) Responses to visual stimuli in thalamic neurons of the turtle *Emys orbicularis*.  
628 *Neurosci Behav Physiol* 10:183–188.
- 629 Bragin A, Jandó G, Nádasdy Z, Hetke J, Wise K, Buzsáki G (1995) Gamma (40-100 Hz)  
630 oscillation in the hippocampus of the behaving rat. *J Neurosci* 15:47–60.
- 631 Butler AB, Hodos W (2005) *Comparative Vertebrate Neuroanatomy: Evolution and Adaptation:*  
632 *Second Edition*. Hoboken, NJ, USA: John Wiley & Sons, Inc.
- 633 Buzsáki G (2002) Theta oscillations in the hippocampus. *Neuron* 33:325–340.
- 634 Fontanini A, Katz DB (2008) Behavioral states, network states, and sensory response variability.  
635 *J Neurophysiol* 100:1160–1168.
- 636 Fournier J, Müller CM, Laurent G (2014) Looking for the roots of cortical sensory computation in  
637 three-layered cortices. *Curr Opin Neurobiol* 31C:119–126.
- 638 Fuster J, Jervey J (1981) Inferotemporal neurons distinguish and retain behaviorally relevant  
639 features of visual stimuli. *Science* (80- ) 212.
- 640 Gross CG, Rocha-Miranda CE, Bender DB (1972) Visual properties of neurons in  
641 inferotemporal cortex of the Macaque. *J Neurophysiol* 35.
- 642 Gusel'nikov V, Pivovarov A (1977) Postsynaptic excitation and inhibition in neurons of the turtle  
643 general cortex in response to moving stimuli. *Neurophysiology* 9:194–199.
- 644 Gusel'nikov VI, Morenkov ED, Pivovarov AS (1972) Unit responses of the turtle forebrain to  
645 visual stimuli. *Neurosci Behav Physiol* 5:235–242.
- 646 Haberly LB (1985) Neuronal circuitry in olfactory cortex: anatomy and functional implications.  
647 *Chem Senses* 10:219–238.

- 648 Holt GR, Softky WR, Koch C, Douglas RJ (1996) Comparison of discharge variability in vitro  
649 and in vivo in cat visual cortex neurons. *J Neurophysiol* 75:1806–1814.
- 650 Kajikawa Y, Schroeder CE (2011) How local is the local field potential? *Neuron* 72:847–858.
- 651 Katzner S, Nauhaus I, Benucci A, Bonin V, Ringach DL, Carandini M (2009) Local origin of field  
652 potentials in visual cortex. *Neuron* 61:35–41.
- 653 Kriegstein AR (1987) Synaptic responses of cortical pyramidal neurons to light stimulation in the  
654 isolated turtle visual system. *J Neurosci* 7:2488–2492.
- 655 Luo Q, Lu H, Lu H, Yang Y, Gao JH (2010) Comparison of visually evoked local field potentials  
656 in isolated turtle brain: Patterned versus blank stimulation. *J Neurosci Methods* 187:26–32.
- 657 Mancilla JG, Fowler M, Ulinski PS (1998) Responses of regular spiking and fast spiking cells in  
658 turtle visual cortex to light flashes. *Vis Neurosci* 15:979–993.
- 659 Mazurskaya PZ (1973a) Organization of receptive fields in the forebrain of *Emys orbicularis*.  
660 *Neurosci Behav Physiol* 6:311–318.
- 661 Mazurskaya PZ (1973b) Retinal projection in the forebrain of *Emys orbicularis*. *Neurosci Behav*  
662 *Physiol* 6:75–82.
- 663 Mulligan K a, Ulinski PS (1990) Organization of geniculocortical projections in turtles: isoazimuth  
664 lamellae in the visual cortex. *J Comp Neurol* 296:531–547.
- 665 Naumann RK, Ondracek JM, Reiter S, Shein-Idelson M, Tosches MA, Yamawaki TM, Laurent G  
666 (2015) The reptilian brain. *Curr Biol* 25:R317–R321.
- 667 Prechtl JC (1994) Visual motion induces synchronous oscillations in turtle visual cortex. *Proc*  
668 *Natl Acad Sci U S A* 91:12467–12471.
- 669 Prechtl JC, Bullock TH (1994) Event-related potentials to omitted visual stimuli in a reptile.  
670 *Electroencephalogr Clin Neurophysiol* 91:54–66.
- 671 Prechtl JC, Bullock TH, Kleinfeld D (2000) Direct evidence for local oscillatory current sources  
672 and intracortical phase gradients in turtle visual cortex. *Proc Natl Acad Sci U S A* 97:877–  
673 882.
- 674 Prechtl JC, Cohen LB, Pesaran B, Mitra PP, Kleinfeld D (1997) Visual stimuli induce waves of  
675 electrical activity in turtle cortex. *Proc Natl Acad Sci U S A* 94:7621–7626.
- 676 Romer AS, Parsons TS (1977) *The Vertebrate Body*. 5th ed. Saunders, Philadelphia.
- 677 Sadagopan S, Ferster D (2012) Feedforward Origins of Response Variability Underlying  
678 Contrast Invariant Orientation Tuning in Cat Visual Cortex. *Neuron* 74:911–923.
- 679 Saha D, Leong K, Katta N, Raman B (2013) Multi-unit recording methods to characterize neural  
680 activity in the locust (*Schistocerca americana*) olfactory circuits. *J Vis Exp*.
- 681 Shew W, Clawson W, Pobst J, Karimipناه Y, Wright NC, Wessel R (2015) Adaptation to  
682 sensory input tunes visual cortex to criticality. *Nat Phys* 11:22–27.
- 683 Ulinski PS, Nautiyal J (1988) Organization of retinogeniculate projections in turtles of the  
684 genera *Pseudemys* and *Chrysemys*. *J Comp Neurol* 276:92–112.
- 685 Wiltschko AB, Gage GJ, Berke JD (2008) Wavelet filtering before spike detection preserves  
686 waveform shape and enhances single-unit discrimination. *J Neurosci Methods* 173:34–40.
- 687 Witter MP (1993) Organization of the entorhinal-hippocampal system: a review of current  
688 anatomical data. *Hippocampus* 3 Spec No:33–44.
- 689 Xing D, Yeh C-I, Shapley R (2009) Spatial spread of the local field potential and its laminar

690 variation in visual cortex. *J Neurosci* 29:11540–11549.  
691 Ziolo MS, Bertelsen MF (2009) Effects of propofol administered via the supravertebral sinus in  
692 red-eared sliders. *J Am Vet Med Assoc* 234:390–393.  
693

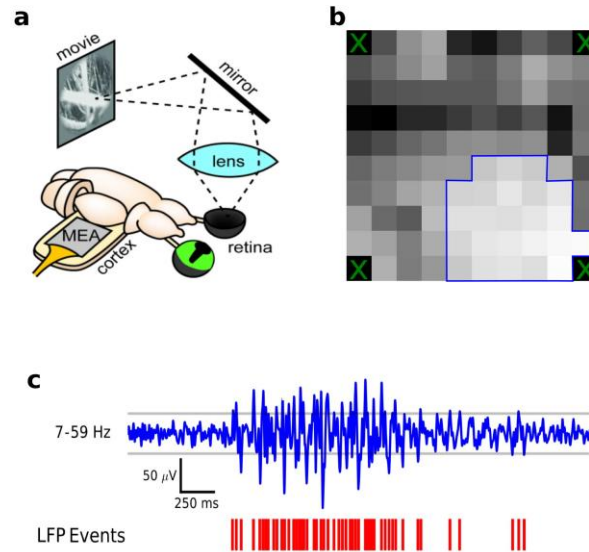

694

695 **Fig. 1** Experimental setup and quantifying LFP events. **a** Our experimental set up for  
696 experiments done with a monitor and mirror. The visual stimuli are presented on a  
697 monitor. The image reflects off a mirror and through a lens to form a picture on the  
698 retina of the turtle's hemisected eye. The multi-electrode array (MEA) is placed in the  
699 unfolded cortex. **b** Visual responsiveness across the MEA. Each square represents an  
700 electrode. The background color for each square indicates strength of their visual  
701 responses with black being the weakest and white being the strongest. Enclosed blue  
702 region indicates visual responses stronger than the threshold and being included in the  
703 analyses. **c** LFP events are referred to threshold crossings. A filtered LFP response is  
704 shown in blue with gray lines as  $\pm 3$  standard deviation, and threshold crossings are  
705 marked in red as LFP events.



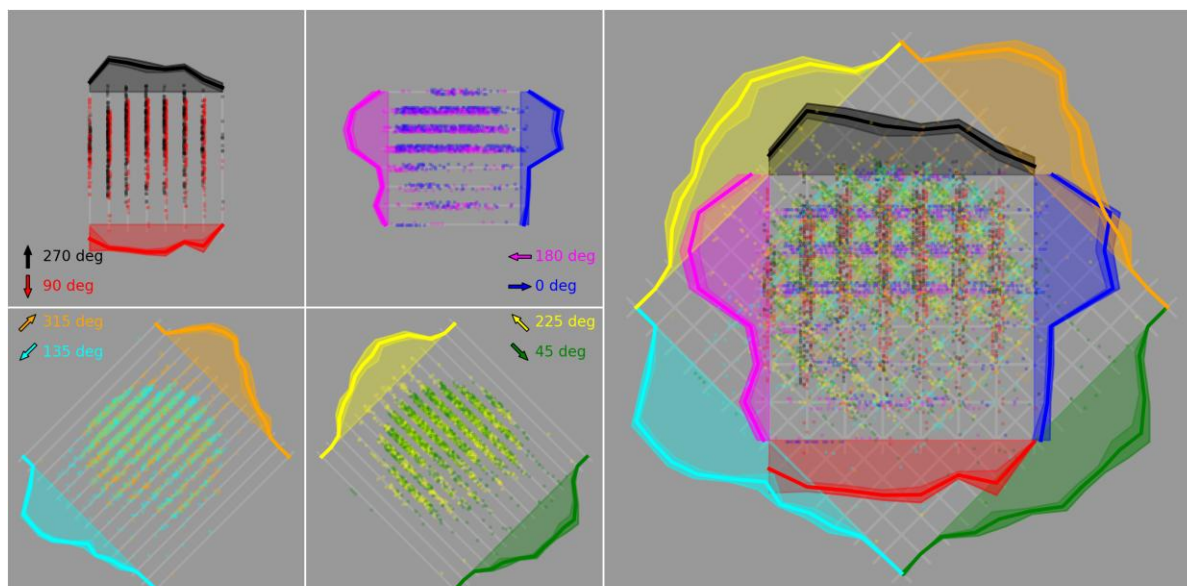

706

707 **Fig. 2** RF of the LFP signals covers over half of the visual field. Each grey square  
708 represents the visual field. Dots move along 8 different paths represented by light grey  
709 lines in 8 different directions. LFP events are color coded according to the direction of  
710 moving dot. In order to aid with visualization, the LFP events are plotted somewhat  
711 offset across each path. The solid lines show the across-trial average of LFP event  
712 count with the standard deviation shown as the filled region around the average solid  
713 line. On the left we presented the data from one electrode only for dots moving in  
714 opposite directions with respect to turtle's visual streak (4 subplots for total of 8  
715 directions). The figure on the right shows all 8 directions together. This shows that this  
716 electrode is responding to stimuli presented across a large region of the visual field.  
717 Retina is briefly exposed to the dots moving along the first and last path and, therefore,  
718 LFP responses are diminished. On the other hand dots presented in the middle paths  
719 usually evoke large responses.

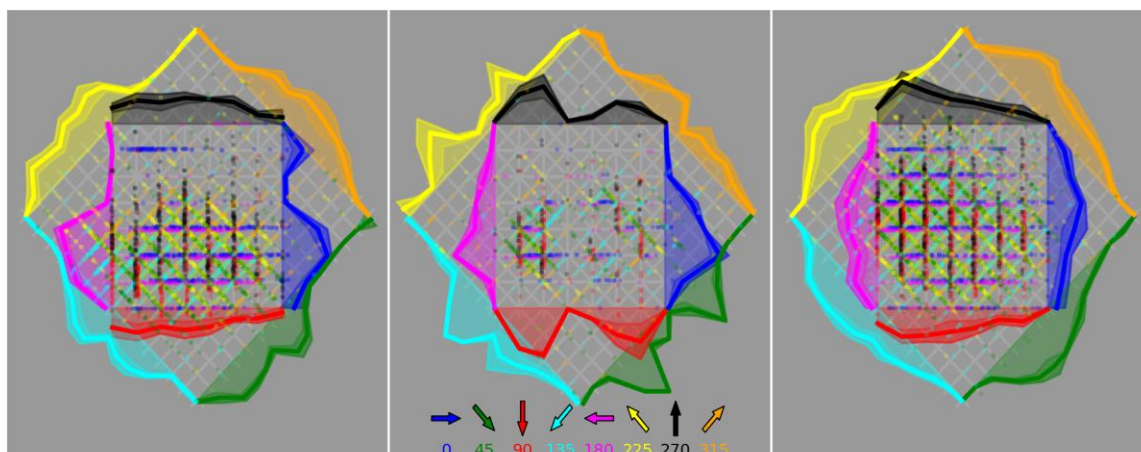

720

721 **Fig. 3** RFs are considerably large for in three different preparations. Responses to black  
722 dots moving in different directions on a white screen from the LFP of a single electrode  
723 in three different preparations exhibit RFs that cover a considerably large region of the  
724 visual field. The middle figure shows that binomial distribution is possible in which  
725 middle paths do not evoke strong responses.

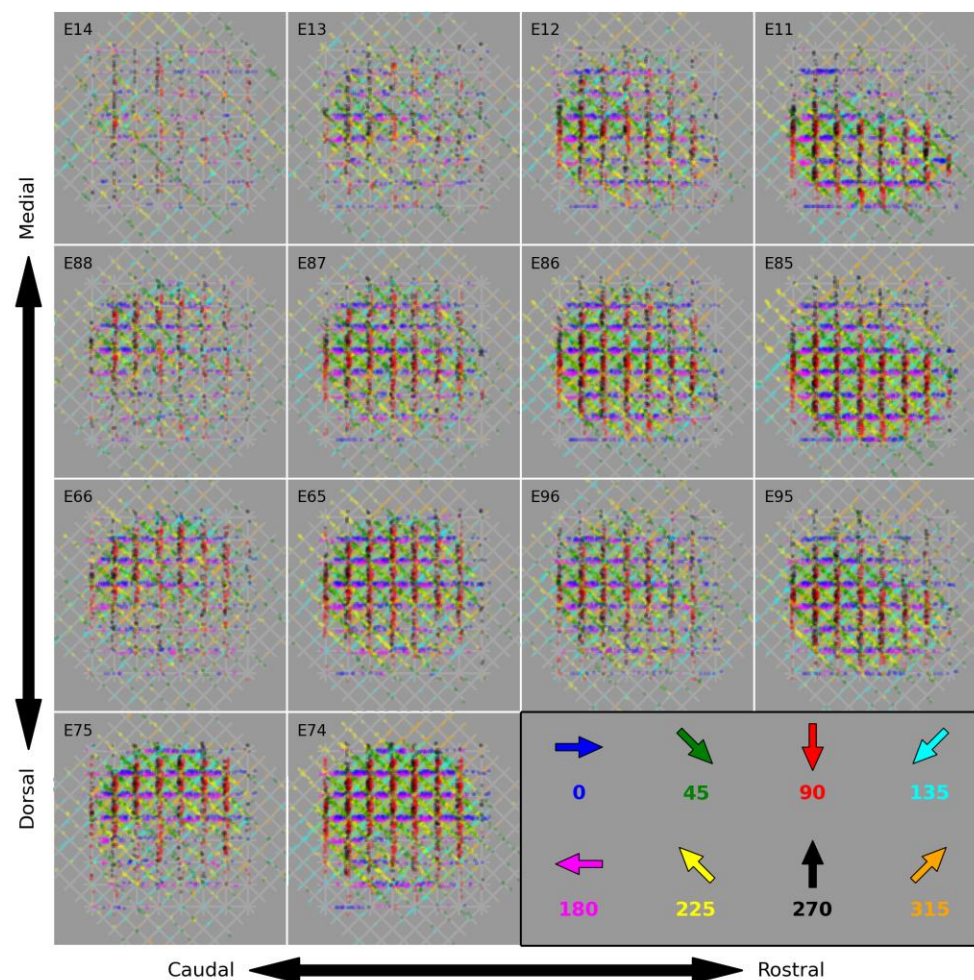

**Fig. 4** RF is large across several electrodes. RFs of 14 electrodes in a preparation are shown in response to moving dots. RFs are arranged based on the location of their electrodes in the MEA. This shows that RFs are considerably large for all the responsive electrodes. More importantly, nearby electrodes appear to have more similar RFs than distant pairs (e.g. see E74 and E75 vs. E74 and E85).

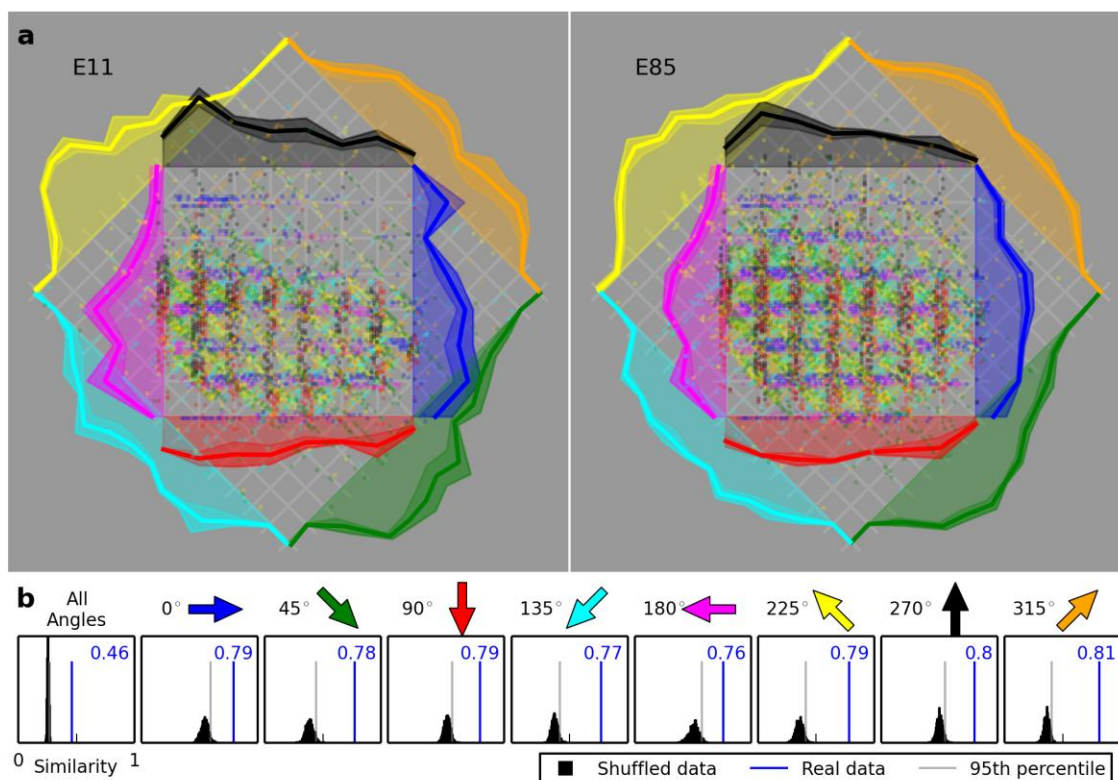

732

733 **Fig. 5** Nearby electrodes have significantly similar RFs. **a** Shown are the RFs for a  
734 nearby pair of electrodes (E85 and E11; see Fig. 4) as plotted in Fig.2. Note the  
735 similarity in the distribution of responses (solid lines) across different directions. **b** The  
736 similarity between the two RFs when the responses to dots moving at all angles are  
737 considered together (the leftmost panel), along with when we consider only the  
738 responses to dots moving at a specific angle. The black distribution shows of 1,000  
739 calculated similarities when the data are shuffled. The light grey line shows the similarity  
740 below which 95% of the shuffled similarities lie. The blue line and number show the  
741 similarity of the real data for the two electrodes that lie well above the significant level.



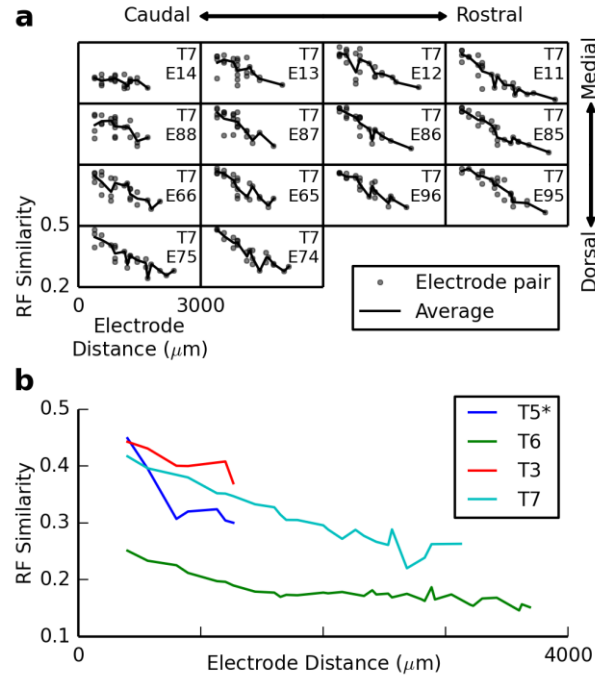

742

743 **Fig. 6** RF similarity gently decays with spatial separation between the electrode pairs. **a**  
744 Plots of RF similarity versus electrode distance. Each plot represents RF similarity of a  
745 reference electrode (show in the plot) with all other 13 electrodes (RFs are shown in  
746 Fig. 4). Plots are arranged based on the location of their reference electrode in the  
747 MEA. In each plot, at a given distance, each point is the similarity of the RF of the  
748 reference electrode with another visually responsive electrode separated with that  
749 distance. Solid line shows the average RF similarity. **b** The average RF similarity at  
750 each electrode pair distance for all visually responsive electrode pairs for four turtles.  
751 \*Turtle 5 was included here to show that its trend is consistent with the others, but the  
752 visual responses for turtle 5 were relatively weak. Therefore, in order to have enough  
753 visually responsive electrode pairs for turtle 5 we used a lower threshold (0.5) for visual  
754 responsiveness.

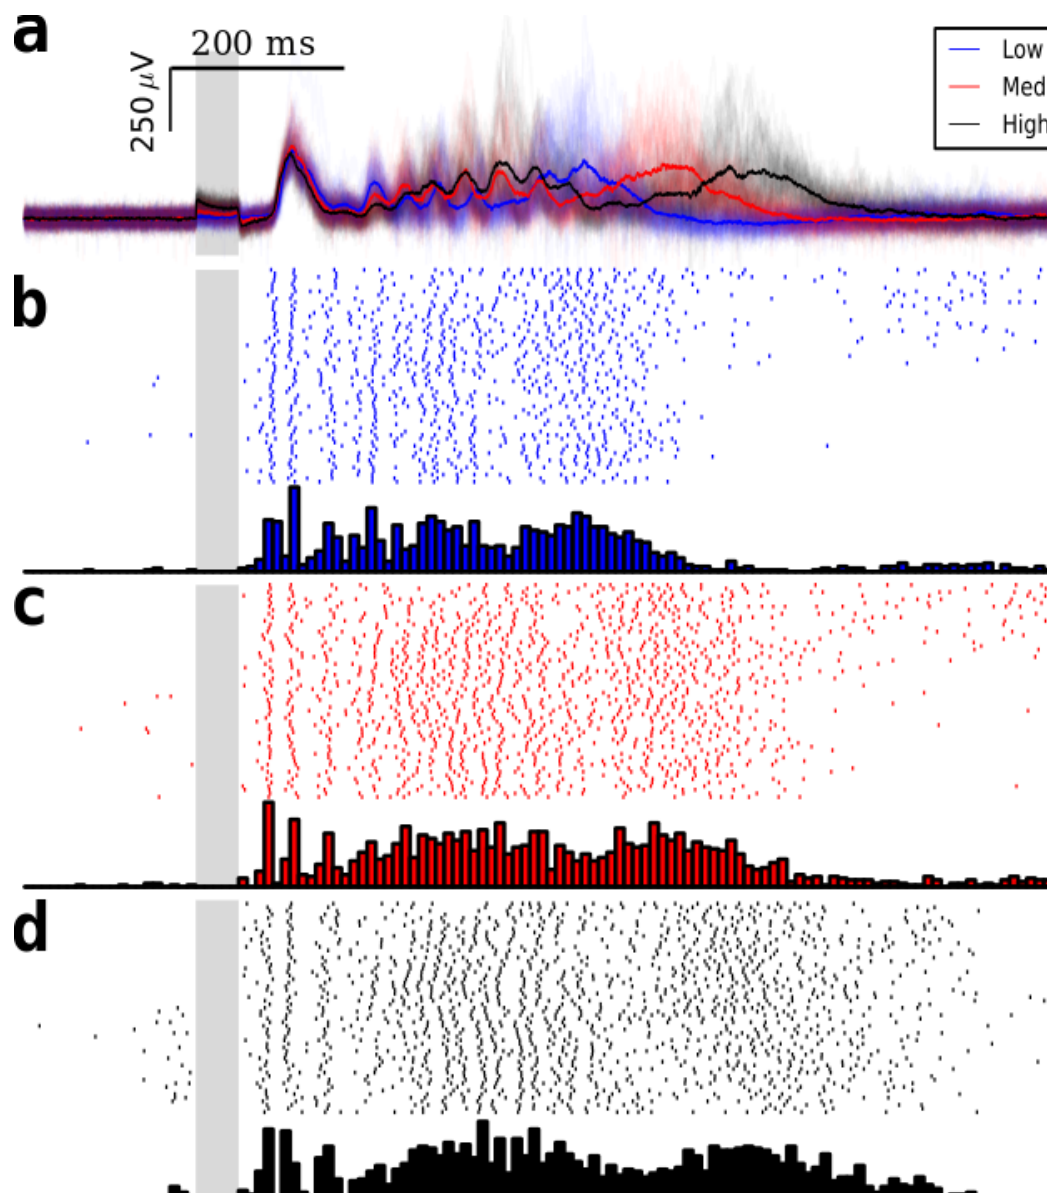

755

756 **Fig. 7** Temporal structure of the responses evoked by brief LED flashes. **a** Individual  
757 LFP responses in low opacity and average responses in bold for three amplitudes (blue,  
758 red, and black for low, medium, and high amplitudes respectively) of 50 *ms* LED flashes  
759 with 30 *s* inter-trial intervals. Early LFP responses consist of several hundred  
760 millisecond oscillations dominated by one or two frequencies while later responses  
761 cover a broad range of frequency spectrum. **b** Rastergram of LFP events (top) with  
762 prestimulus time histogram (PSTH; bottom) in response to low-amplitude flashes.  
763 Rastergram reveals the presence of oscillations in early responses. **c** and **d** Same as in  
764 **b** for medium and high flash amplitudes.

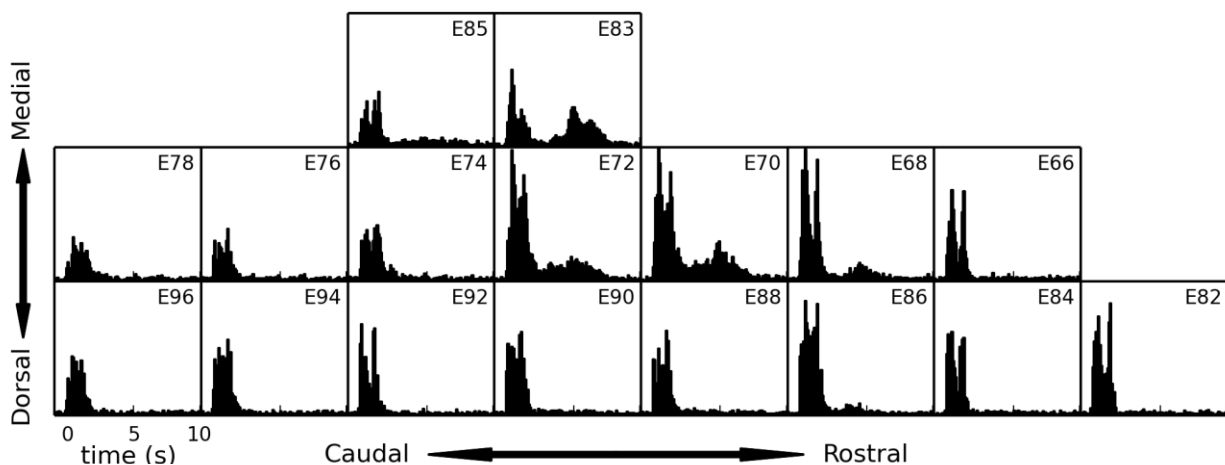

765  
766 **Fig. 8** Persistent response happens on several electrodes. PSTHs are calculated over  
767 an extended period of time (10 s window) for several electrodes in response to a brief  
768 50 *ms* LED flash. Plots are arranged based on the location of their corresponding  
769 electrodes in MEA. A second wave of activity occurs several seconds after stimulus  
770 onset and lasts for several seconds.

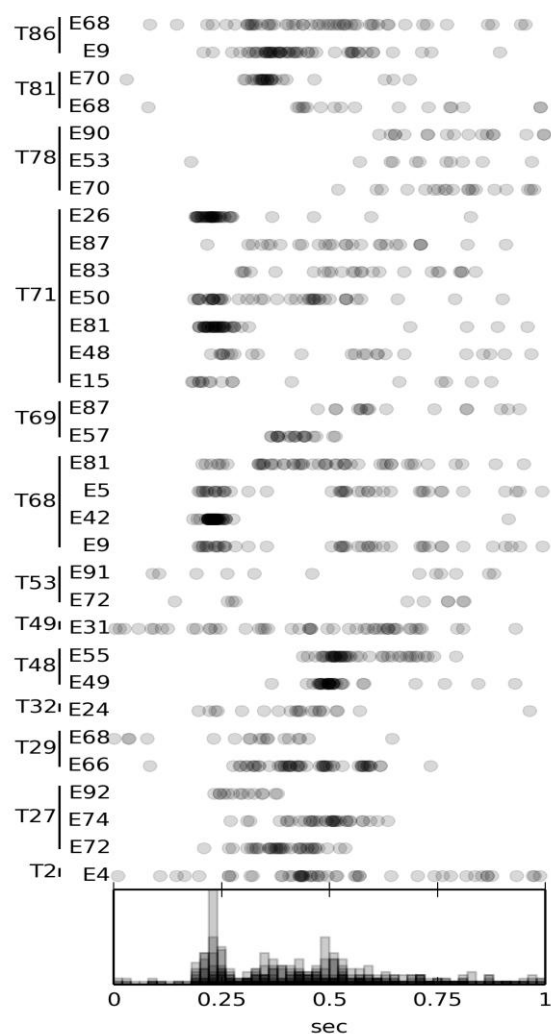

**Fig. 9** A typical latency to first evoked spike is around 200 – 500 *ms*. The time of the first detected spikes following either the onset of a red LED flash or the transition from a blank screen to the beginning of a complex movie are marked by grey circles. Latencies are shown for several trials of 32 channels across 13 different turtles. Data exhibits a significantly wide range for latency among channels, trials, and turtles. Summary histogram is shown at the bottom which shows a typical 200–500 *ms* delay. Same wavelet filtering technique is used to detect spikes, but with different parameters (Daubechies wavelets with minimum level of 3, maximum level of 7, minimum frequency of 117 *Hz*, and maximum frequency of 3750 *Hz* with a 10 times standard deviation as threshold).



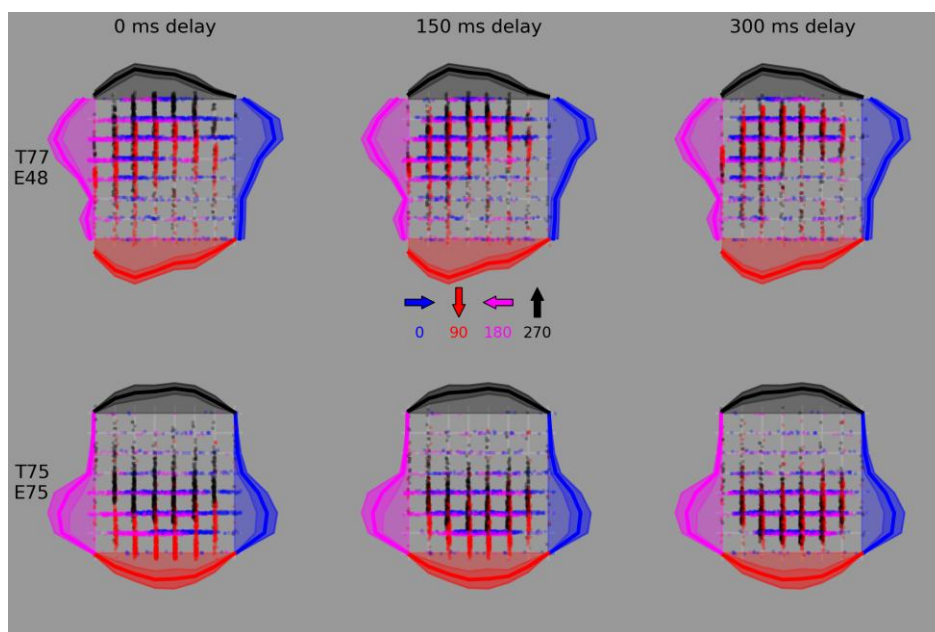

790

791 **Fig. 10** RFs converge most with delays of  $\sim 300$  ms. Applying a range of delays  
792 (0, 150, 300 ms) for two electrodes of two different turtles across several moving dot  
793 directions. Detected LFP events are attributed to the region of visual field in which the  
794 dot was at prior time. We see the most overlap of the contributions to the visual field  
795 from dots moving at different angles for a 300 ms time delay.

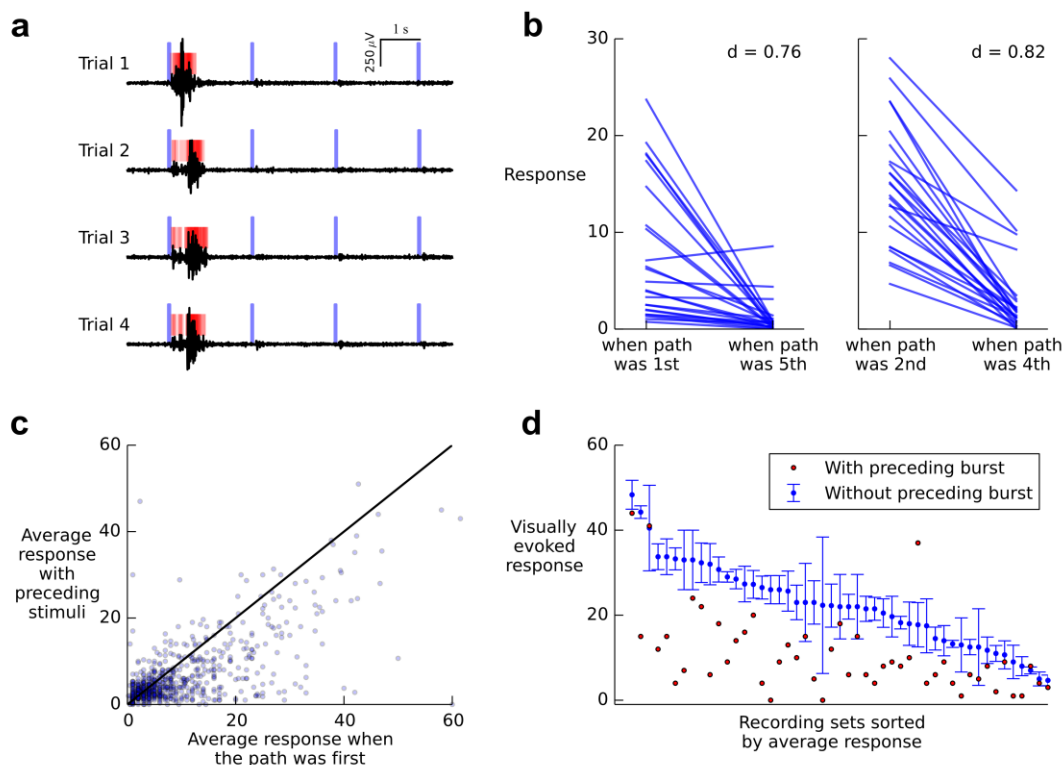

796

797 **Fig. 11** Cortical adaptation to evoked and ongoing activity. **a** LFP responses to four  
798 repeated presentations of a series of four brief full field flashes (flash timing indicated by  
799 blue vertical bars; 100 ms flashes with 2 s inter-flash-interval). LFP threshold crossings  
800 are indicated by red rasters. Adaptation abolishes responses to subsequent flashes. **b**  
801 The responses to dots moving along 5 paths across visual field greatly adapt. For each  
802 path the response strengths when the path was an early stimulus in the series of stimuli  
803 (i.e., either the first or second path to be presented) is compared against the response  
804 strengths when the same path was presented later in the series of stimuli (i.e., either the  
805 fourth or fifth path). Each point plotted is the average of 7-30 trials. The average  
806 decrease in response strength,  $d$ , is 0.76 (left) and 0.82 (right). **c** Average response  
807 with preceding stimuli is significantly smaller than first path average response ( $p \ll$   
808 0.001). **d** Response strengths with and without preceding spontaneous activity. We  
809 show visual responses from several different stimuli. Red dots indicate individual  
810 responses to visual stimuli that were preceded by a strong burst of spontaneous activity  
811 within a 5 s window before the stimulus. For each of those recordings, the average  
812 response of the 2-4 trials of the same stimulus nearest in time to the recording that was  
813 preceded by a burst is shown in blue with error bars showing the standard deviation.  
814 The 2-4 reference recordings were selected from recordings that were not preceded by  
815 a spontaneous burst of activity. Each recording preceded by a spontaneous burst  
816 together with the 2-4 reference recordings are collectively referred to as a recording set.  
817 Clearly spontaneous activity leads to a significant and reliable adaptation of subsequent  
818 visual responses.

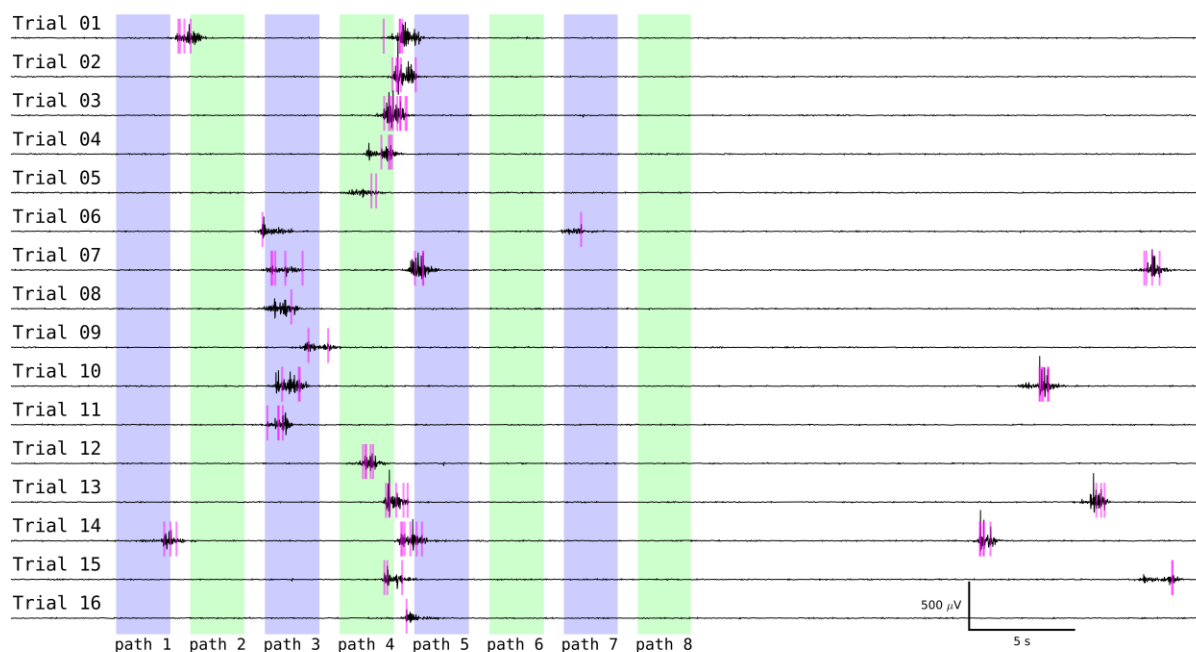

819

820 **Fig. 12** Responses exhibit variable strength, onset timing, or temporal properties. LFP  
821 signal (black) with action potentials (magenta rasters) during 16 trials of 8 dots moving  
822 along 8 different paths in one direction. The 8 colored columns indicate the timing of the  
823 8 dots moving across the visual field. If we compare the responses to the 3<sup>rd</sup> path in the  
824 7<sup>th</sup> and 8<sup>th</sup> trial, we find markedly different response amplitudes. Response onset time to  
825 the 4<sup>th</sup> path shows variability of order of several seconds as well as in how that response  
826 plays out. For some trials (e.g., trials 1-3) we see roughly one large burst, and for others  
827 (e.g., trial 4) it looks more like a series of two smaller bursts.

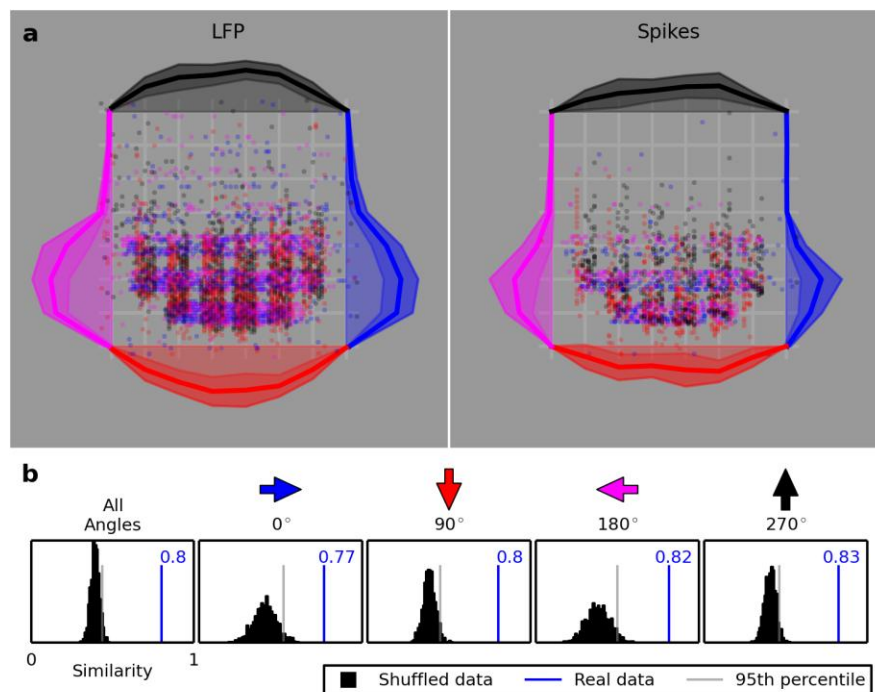

828

829 **Fig. 13** Spike-LFP RF exhibits a significant similarity. **a** The LFP (left) and spike (right)  
830 RFs for one electrode are plotted. The spike RF is obviously smaller than the LFP RF  
831 but still considerably large. **b** The similarity between the two RFs when the responses to  
832 dots moving at all angles are considered together, along with the similarity separately  
833 for different angles. The black distribution shows the distribution of 1,000 calculated similarities when  
834 the data are shuffled. The blue line and number show the similarity of the real data, and  
835 the light grey line shows the similarity below which 95% of the shuffled similarities lie.

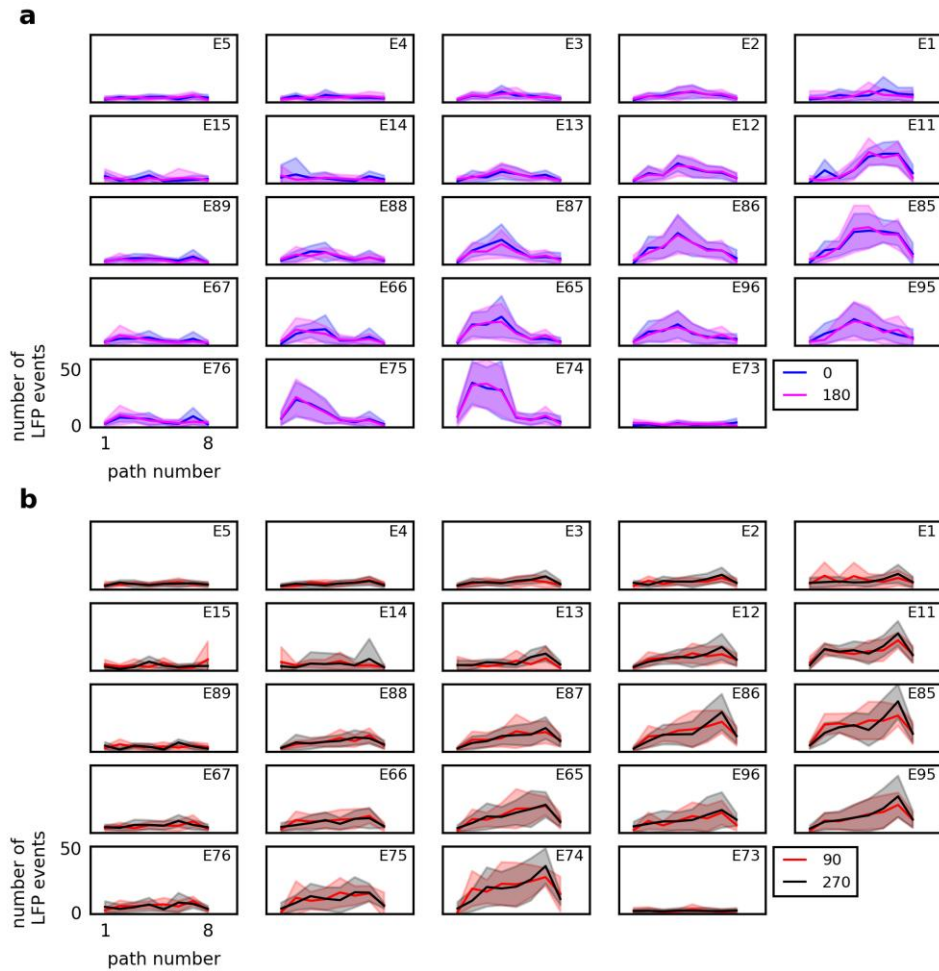

836

837 **Fig. 14** No clear mapping from the visual field to the visual cortex exist. **a** Naso-  
838 temporal response specificity has variable amplitude but similar patterns for the  
839 recording sites on MEA. For 24 electrodes we show the average responses (lines) and  
840 standard deviations (filled area around the lines), in response to dots moving along 8  
841 different vertical paths arranged naso-temporally in the visual field. The two colors  
842 represent the two opposite angles that traverse the paths. Response strength varies but  
843 not the pattern and, moreover, the variations from site to site did not follow any clear  
844 trend. **b** LFP responses to dots moving along 8 paths arranged vertically in the visual  
845 field plotted in the same format as in **a**. The two colors represent the two opposite  
846 angles.
